# Supplementary material
Source: PubMed Central journal article supplement (PMC2546932)

## Supplementary figure legends

1

2 Fig. S1. OPN provides cells an increased resistance to UV-induced apoptosis dependent  
3 on CD44 variant isoform. Subconfluent AZ521 clones harboring control plasmid or  
4 plasmids encoding specific CD44 isoforms were cultured in serum-free medium for 24 h,  
5 and incubated with or without added OPN (10  $\mu\text{g}/\text{ml}$ ) for 4 h. Cells were then  
6 UV-irradiated at  $90\text{ J}/\text{m}^2$ , and harvested for apoptosis assay by flow cytometric analyses  
7 of sub-G1 fractions at designated time.

8 Fig. S2. Engagement of CD44 induces lipid raft coalescence. AZ521/CD44<sub>V6-10</sub> cells  
9 were treated with or without OPN or Hermes-3 (H-3). The cells were lysed in chilled 1%  
10 cold Triton X-100 buffer, and lysates were subjected to sucrose gradient fractionation as  
11 described in the Materials and methods. A total of 10 fractions were collected from top to  
12 bottom. The 2-4 fractions represent the lipid rafts. The relative protein distribution of the  
13 low-density fractions (as pooled from fractions 2-4) isolated from AZ521/Mock and  
14 AZ521/CD44<sub>V6-10</sub> cells treated with H-3 (as filled bars), OPN-treated (as hatched bar) and  
15 untreated or control (as empty bars) cells was shown in a bar graph. Data from three  
16 separate experiments are collected and presented as mean  $\pm$  SD. \*\*,  $P < 0.01$  by *t* test.

17 Fig. S3. Engagement of CD44 mutants that are defective in associating with lipid rafts  
18 fails to induce lipid raft reorganization. Individual AZ521/CD44 cell clones were treated  
19 with IgG or H-3 mAb as described. The cells were lysed in chilled 1% cold Triton X-100  
20 buffer, and lysates were subjected to sucrose gradient fractionation as described. A total  
21 of 10 fractions were collected from top to bottom. The relative protein distribution of the  
22 low-density fractions (as pooled from fractions 2-4) was shown in a bar graph. Data from  
23 three separate experiments are presented as mean  $\pm$  SD. \*\*,  $P < 0.01$  by *t* test.

# Fig. S1

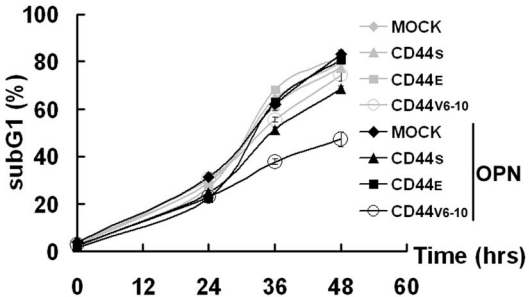

# Fig. S2

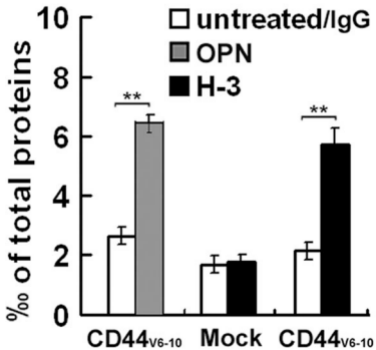

**Fig. S3**

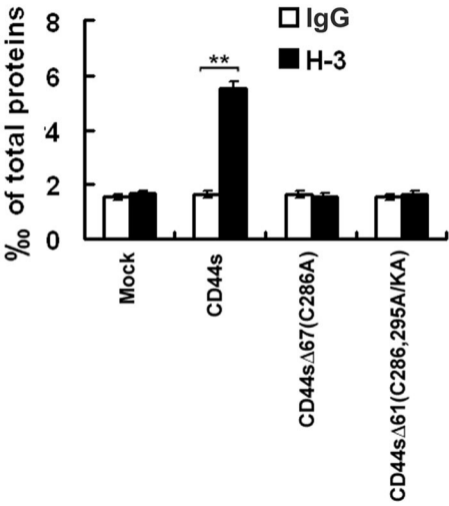

Supplement: supp_28_18_5710__1.pdf [file supp_28_18_5710__1.pdf]
